# Supplementary material
Source: HighWire-hosted journal article supplement (https://jcp.bmj.com/content/76/10/664)
Supplement: inline-supplementary-material-1 [file inline-supplementary-material-1.pdf]

| Items     | Short description of the items                                            | Relevant (experts giving rating 3 or 4) | Not - Relevant (experts giving rating 1 or 2) | I-CVIs  | S-CVI/Ave |
|-----------|---------------------------------------------------------------------------|-----------------------------------------|-----------------------------------------------|---------|-----------|
| <b>1</b>  | Site of incision                                                          | 17                                      | 0                                             | 1       | 0.92      |
| <b>2</b>  | Extent of incision                                                        | 17                                      | 0                                             | 1       |           |
| <b>3</b>  | Procedure of reflection of the muscle flaps to enter the abdominal cavity | 15                                      | 2                                             | 0.8823  |           |
| <b>4</b>  | Procedure of removal of sub-diaphragmatic organs                          | 16                                      | 1                                             | 0.94117 |           |
| <b>5</b>  | Procedure of removal of other intra-abdominal organs                      | 15                                      | 2                                             | 0.8823  |           |
| <b>6</b>  | Procedure of collection of body fluids                                    | 17                                      | 0                                             | 1       |           |
| <b>7</b>  | Procedure of removal of diaphragm                                         | 16                                      | 1                                             | 0.94117 |           |
| <b>8</b>  | Procedure of dissection of the intra thoracic organs                      | 14                                      | 3                                             | 0.8235  |           |
| <b>9</b>  | Closer of the abdominal muscle layer                                      | 14                                      | 3                                             | 0.8235  |           |
| <b>10</b> | Closer of the skin                                                        | 17                                      | 0                                             | 1       |           |

Supplemental Table 1 – Items of Validation with scoring
