# Supplementary material
Source: HighWire-hosted journal article supplement (https://jcp.bmj.com/content/76/10/664)
Supplement: inline-supplementary-material-2 [file inline-supplementary-material-2.pdf]

| Items | Short description of the items                                                                              | Remarks                                                                                                                                                                                                                                                                    |
|-------|-------------------------------------------------------------------------------------------------------------|----------------------------------------------------------------------------------------------------------------------------------------------------------------------------------------------------------------------------------------------------------------------------|
| 1     | Site of incision<br>an upper midline<br>scalpel incision of the<br>skin along the axis of<br>the linea alba | No Modification                                                                                                                                                                                                                                                            |
| 2     | Extent of incision<br>xiphoid process to<br>syphysis pubis<br>encircling the<br>umbilicus                   | No Modification                                                                                                                                                                                                                                                            |
| 3     | Procedure of reflection<br>of the muscle flaps to<br>enter the abdominal<br>cavity                          | Modification was made to include the incision of medial part<br>of internal oblique muscle for better exposure                                                                                                                                                             |
| 4     | Procedure of removal<br>of sub-diaphragmatic<br>organs                                                      | No Modification                                                                                                                                                                                                                                                            |
| 5     | Procedure of removal<br>of other intra-<br>abdominal organ                                                  | Sequential opening of solid viscera followed by hollow viscera<br>was modified by the opening of hollow viscera followed by<br>solid viscera. The idea behind this was that the viscera is to be<br>opened in the sequence of food digestion → metabolism →<br>elimination |
| 6     | Procedure of collection<br>of body fluids                                                                   | No Modification                                                                                                                                                                                                                                                            |
| 7     | Procedure of removal<br>of diaphragm                                                                        | No Modification                                                                                                                                                                                                                                                            |
| 8     | Procedure of<br>dissection of the intra<br>thoracic organs                                                  | Removal of heart followed by lungs was modified by removal<br>of lungs followed by heart. The idea behind the modification<br>was that pathological changes occurring in the primary organ<br>are to be dissected first.                                                   |
| 9     | Closer of the<br>abdominal muscle<br>layer                                                                  | No Modification                                                                                                                                                                                                                                                            |
| 10    | Closer of the skin                                                                                          | Single layer closer was converted to two layer suture in<br>reverse order to ensure zero leakage.                                                                                                                                                                          |

Supplemental Table 2 - Details of the modifications done following the recommendation of the expert group in final round
